# Supplementary material for: Exploring the Role of WRKY Transcription Factor in the Growth and Development of Bletilla striata based on Bioinformatics Analysis
Source: Research Square preprint supplement (doi:10.21203/rs.3.rs-1023129/v1), 2021-11-10
Supplement: Supplementary file 1 [file ee8861b5ed2dafdb9cbe069f.docx]

**Appendix**

Table A The information of EST-SSR primers

| Gene name | | Repeat | Forward primer | Reverse primer | Target band size (bp) | | |
| --- | --- | --- | --- | --- | --- | --- | --- |
| *BSWRKY5* | CT (18) | | CACCTGCTGTCTGTTTTTTTT | TGGAAGAAGTCTACGTTGTG | | | 136 |
| *BSWRKY13* | | CT (10) | GCATCCATGGCAATAGTCTA | TAAAACGGGCAGATGAAGAA | | 147 | |
| *BSWRKY14* | | CGG (5) | GGAGGGGAAGATGTAAAGC | GCAATTTACGAGCAAGAACA | | 134 | |
| *BSWRKY16* | | CGG (5) | GGAGGGGAAGATGTAAAGC | GCAATTTACGAGCAAGAACA | | 134 | |
| *BSWRKY18* | | ATA (7) | AAGAAGGCTTGACTTTAGGA | CTCACCAGCTTCTTCTTCTT | | 132 | |
| *BSWRKY19* | | TA (11) | GGTGCTGTTCTAGTGTCAAT | AAAAGGATTCATGTAGCCGA | | 121 | |
| *BSWRKY20* | | GAG (6) | GATAACTTACACCGGAGAGC | AACATCCCTTCGTCTTCTTC | | 194 | |
| *BSWRKY23* | | ATA (7) | AAGAAGGCTTGACTTTAGGA | CCAGCTTCTTCTTCTTTGGT | | 126 | |
| *BSWRKY24* | | ATA (7) | GGCTTGACTTTAGGATTAGA | CTTCTTCTTTGGTCTCCTCA | | 114 | |
| *BSWRKY27* | | ATA (7) | AAGAAGGCTTGACTTTAGGA | CTCACCAGCTTCTTCTTCTT | | 130 | |
